# Supplementary material for: Einflussfaktoren auf das Einnahmeverhalten von Analgetika bei Patient*innen mit chronischen tumorassoziierten Schmerzen
Source: Springer Nature journal article supplement (doi:10.1007/s00482-023-00765-y), 2023-11-13
Supplement: MOESM1 [file 26296680]

**Leitfaden: Welche Faktoren beeinflussen das Einnahmeverhalten von Schmerzmedikamenten gemäß einem ärztlichen Verordnungsplan bei Palliativpatienten mit tumorbedingten Schmerzen?**

| <b>I. Gesprächseröffnung: Allgemeiner Rahmen</b>                                                            |                                 |                   |
|-------------------------------------------------------------------------------------------------------------|---------------------------------|-------------------|
| <b>Inhaltliche Aspekte</b>                                                                                  | <b>Aufrechterhaltungsfragen</b> | <b>Nachfragen</b> |
| Vorstellung der eigenen Person                                                                              |                                 |                   |
| Ideen und Ziele des Interviews                                                                              |                                 |                   |
| Technische Angaben zum Interview<br>(Tonaufnahme, Dauer ca. 30min.)                                         |                                 |                   |
| Vorstellung des Patienten (Name,<br>Geburtsdatum, Art der<br>Tumorerkrankung mit Datum der<br>Erstdiagnose) |                                 |                   |
| Datum/Zeitraum des ersten<br>tumorbedingten Schmerzerlebens                                                 |                                 |                   |

| <b>II. Hauptteil – Frühes Stadium des Interviews</b>                                                                                                                                                                                                                                                                                                                                                                                                                                                        |                                                                                                                                            |                                                                                                                                                                                                                                                                                                                                                              |
|-------------------------------------------------------------------------------------------------------------------------------------------------------------------------------------------------------------------------------------------------------------------------------------------------------------------------------------------------------------------------------------------------------------------------------------------------------------------------------------------------------------|--------------------------------------------------------------------------------------------------------------------------------------------|--------------------------------------------------------------------------------------------------------------------------------------------------------------------------------------------------------------------------------------------------------------------------------------------------------------------------------------------------------------|
| <p><b>Wie war Ihr Schmerzerleben im Verlauf der Tumorerkrankung?</b></p> <p><b>Wie würden Sie Ihre Erfahrung mit der Einnahme von Schmerzmedikamenten beschreiben?</b></p> <p><b>Was ist ihre aktuelle Schmerzmedikation?</b></p> <p><b>Wie fühlen Sie sich, wenn Sie aktuell Schmerzmedikamente einnehmen?</b></p> <p><b>Haben Sie schon einmal vergessen, Schmerzmedikamente einzunehmen?</b></p> <p><b>Nehmen Sie die Schmerzmedikamente immer genauso, wie der Arzt sie Ihnen verschrieben hat?</b></p> |                                                                                                                                            |                                                                                                                                                                                                                                                                                                                                                              |
| <b>Inhaltliche Aspekte</b>                                                                                                                                                                                                                                                                                                                                                                                                                                                                                  | <b>Aufrechterhaltungsfragen</b>                                                                                                            | <b>Nachfragen</b>                                                                                                                                                                                                                                                                                                                                            |
| <p>Subjektive Bedeutungszuschreibung</p> <p>Wichtigkeit/Relevanz der verschriebenen Medikation</p>                                                                                                                                                                                                                                                                                                                                                                                                          | <p>Fällt Ihnen dazu sonst noch was ein?</p> <p>Gibt es sonst noch was?</p> <p>Und dann?</p> <p>Und sonst?</p> <p>Was meinen Sie damit?</p> | <ul style="list-style-type: none"> <li>• Passiert das Vergessen der Einnahme von Schmerzmedikamenten in der Hektik</li> <li>• Was trägt aus ihrer Sicht sonst dazu bei, dass Schmerzmedikamente nicht wie geplant eingesetzt werden?</li> <li>• Spielt die Person des verschreibenden Arztes aus Ihrer Sicht eine Rolle für ihr Einnahmeverhalten</li> </ul> |

| <b>III. Hauptteil – Spätes Stadium des Interviews</b>                                                                                                                                                                                                                                                                                                                                                                                                                                                                                                                                                                                                                                                                                                                                                                                     |                                      |                                                                                                                                                                                                                                                                                                                                                                                                                |
|-------------------------------------------------------------------------------------------------------------------------------------------------------------------------------------------------------------------------------------------------------------------------------------------------------------------------------------------------------------------------------------------------------------------------------------------------------------------------------------------------------------------------------------------------------------------------------------------------------------------------------------------------------------------------------------------------------------------------------------------------------------------------------------------------------------------------------------------|--------------------------------------|----------------------------------------------------------------------------------------------------------------------------------------------------------------------------------------------------------------------------------------------------------------------------------------------------------------------------------------------------------------------------------------------------------------|
| <p><b>Erzählen Sie doch mal: Wie managen Sie Ihre tägliche Medikation?</b></p> <p><b>Welche Nebenwirkungen von Schmerzmedikamenten haben sie schon gehabt?</b></p> <p><b>Wurden Ihr Alltag und ggf. auch Ihr Berufsleben von Nebenwirkungen verändert?</b></p> <p><b>Was bedeutet es für Ihren Alltag, regelmäßig Schmerzmedikamente einnehmen zu müssen?</b></p> <p><b>Was denken Sie über die Balance zwischen der häufigen Einnahme von Schmerzmedikamenten und ihrem Alltag?</b></p> <p><b>Was bedeutet es für sie, täglich Schmerzmedikamente wie ärztlich verordnet, einnehmen zu müssen?</b></p> <p><b>Haben Sie schon einmal Schmerzmedikamente <u>willentlich</u> über oder unterdosiert?</b></p> <p><b>Haben Sie Bedenken/Angst vor morphinähnlichen Substanzen?</b></p> <p><b>Was ist die Folge dieser Bedenken/Angst?</b></p> |                                      |                                                                                                                                                                                                                                                                                                                                                                                                                |
| <b>Inhaltliche Aspekte</b>                                                                                                                                                                                                                                                                                                                                                                                                                                                                                                                                                                                                                                                                                                                                                                                                                | <b>Aufrechterhaltungsfragen</b>      | <b>Nachfragen</b>                                                                                                                                                                                                                                                                                                                                                                                              |
| Ablauf bei neu aufgetretenen oder exazerbierten Schmerzen                                                                                                                                                                                                                                                                                                                                                                                                                                                                                                                                                                                                                                                                                                                                                                                 | Fällt Ihnen dazu sonst noch was ein? | <ul style="list-style-type: none"> <li>• Wie viele und welche Schmerzmittel müssen Sie momentan einnehmen?</li> <li>• Gibt es spezielle Medikamente, bei denen es Ihnen widerstrebt, sie einzunehmen?</li> <li>• Ist das Verhältnis zum verschreibenden Arzt dadurch merklich gestört?</li> <li>• Gibt es Schmerzmedikamente, die sie eher als andere eigenmächtig unter- oder überdosieren würden?</li> </ul> |
| Erleben von Ärzten während der Rezeptierung                                                                                                                                                                                                                                                                                                                                                                                                                                                                                                                                                                                                                                                                                                                                                                                               | Gibt es sonst noch was?              |                                                                                                                                                                                                                                                                                                                                                                                                                |
| Hilfreiche/belastende Elemente                                                                                                                                                                                                                                                                                                                                                                                                                                                                                                                                                                                                                                                                                                                                                                                                            | Und dann?                            |                                                                                                                                                                                                                                                                                                                                                                                                                |
|                                                                                                                                                                                                                                                                                                                                                                                                                                                                                                                                                                                                                                                                                                                                                                                                                                           | Und sonst?                           |                                                                                                                                                                                                                                                                                                                                                                                                                |
|                                                                                                                                                                                                                                                                                                                                                                                                                                                                                                                                                                                                                                                                                                                                                                                                                                           | Was meinen Sie damit?                |                                                                                                                                                                                                                                                                                                                                                                                                                |

| <b>IV. Der Abschluss des Interviews</b>                                                                                                                                                                                  |                                                                                                        |                                                                                                                                                                                                                                |
|--------------------------------------------------------------------------------------------------------------------------------------------------------------------------------------------------------------------------|--------------------------------------------------------------------------------------------------------|--------------------------------------------------------------------------------------------------------------------------------------------------------------------------------------------------------------------------------|
| <b>Wenn Sie nun zum Schluss unseres Interviews einmal selber in einer Reihenfolge von 1-3 sagen müssen, welche drei Dinge Ihr Einnahmeverhalten von Schmerzmedikamenten am meisten beeinflusst hat, was wären diese?</b> |                                                                                                        |                                                                                                                                                                                                                                |
| <b>Inhaltliche Aspekte</b>                                                                                                                                                                                               | <b>Aufrechterhaltungsfragen</b>                                                                        | <b>Nachfragen</b>                                                                                                                                                                                                              |
|                                                                                                                                                                                                                          | Fällt Ihnen dazu sonst noch was ein?<br>Gibt es sonst noch was?<br>Und sonst?<br>Was meinen Sie damit? | <ul style="list-style-type: none"> <li>• Was würden Sie denn nach einem Rollentausch als Arzt gegenüber einem Schmerzpatienten anders machen?</li> <li>• Was wünschen Sie sich für Ihre zukünftige Schmerztherapie?</li> </ul> |

| <b>Offene Nachfrage zum Abschluss</b>                                                                                                                                                                                                                                                 |
|---------------------------------------------------------------------------------------------------------------------------------------------------------------------------------------------------------------------------------------------------------------------------------------|
| <p><b>Von meiner Seite aus sind wir langsam ans Ende des Interviews gelangt. Gibt es noch etwas, das wichtig für Sie ist, hier in unserem Interview aber noch nicht zur Sprache gekommen ist?</b></p> <p><b>Herzlichen Dank für Ihre Teilnahme! Ich wünsche Ihnen alles Gute.</b></p> |
