# Supplementary material for: Einflussfaktoren auf das Einnahmeverhalten von Analgetika bei Patient*innen mit chronischen tumorassoziierten Schmerzen
Source: Springer Nature journal article supplement (doi:10.1007/s00482-023-00765-y), 2023-11-13
Supplement: MOESM3 [file 26296680]

## Liste der Codes

| Liste der Codes                                                                                           | Häufigkeit |
|-----------------------------------------------------------------------------------------------------------|------------|
| Codesystem                                                                                                | 770        |
| Adhärenzverhalten aus Patient*innensicht                                                                  | 15         |
| Adhärenzverhalten aus Patient*innensicht\Unbewusste Therapieänderung                                      | 0          |
| Adhärenzverhalten aus Patient*innensicht\Unbewusste Therapieänderung\Vergessen der Einnahme               | 9          |
| Adhärenzverhalten aus Patient*innensicht\Unbewusste Therapieänderung\Aus Versehen                         | 1          |
| Adhärenzverhalten aus Patient*innensicht\Bewusste Therapieänderung                                        | 11         |
| Adhärenzverhalten aus Patient*innensicht\Bewusste Therapieänderung\Variieren des Einnahmeintervalls       | 4          |
| Adhärenzverhalten aus Patient*innensicht\Bewusste Therapieänderung\Einnahme nach Bedarf statt nach Schema | 3          |
| Beziehung zu Behandelnden                                                                                 | 0          |
| Beziehung zu Behandelnden\Behandlung                                                                      | 0          |
| Beziehung zu Behandelnden\Behandlung\Eigene Entscheidung treffen                                          | 2          |
| Beziehung zu Behandelnden\Behandlung\unzufrieden mit watchfull waiting                                    | 3          |
| Beziehung zu Behandelnden\Behandlung\unzufrieden ohne Diagnose                                            | 2          |
| Beziehung zu Behandelnden\Kommunikation                                                                   | 0          |
| Beziehung zu Behandelnden\Kommunikation\paternalistische Kommunikation                                    | 4          |
| Beziehung zu Behandelnden\Kommunikation\unzufrieden mit mangelnder Kommunikation                          | 1          |
| Beziehung zu Behandelnden\Kommunikation\zufrieden mit Erklärungen                                         | 5          |
| Beziehung zu Behandelnden\Kommunikation\Einfache Wortwahl                                                 | 2          |
| Beziehung zu Behandelnden\Kommunikation\Gehört fühlen                                                     | 1          |
| Beziehung zu Behandelnden\Setting                                                                         | 3          |

|                                                                                              |    |
|----------------------------------------------------------------------------------------------|----|
| Beziehung zu Behandelnden\Setting\"Halo-Effekt"                                              | 3  |
| Beziehung zu Behandelnden\Setting\Vertrauen                                                  | 4  |
| Einstellung und Überzeugungen                                                                | 0  |
| Einstellung und Überzeugungen\Angst                                                          | 1  |
| Einstellung und Überzeugungen\Angst\Angst vor Schmerzexacerbation                            | 2  |
| Einstellung und Überzeugungen\Angst\Opioide Abhängigkeit                                     | 1  |
| Einstellung und Überzeugungen\Angst\Wechselwirkung mit anderen Erkrankungen und Medikamenten | 1  |
| Einstellung und Überzeugungen\Angst\Angst vor unklaren Nebenwirkungen                        | 7  |
| Einstellung und Überzeugungen\Angst\Keine Angst (vor Opioiden)                               | 5  |
| Einstellung und Überzeugungen\Angst\Angst um Organe (siehe Memo 127)                         | 7  |
| Einstellung und Überzeugungen\Angst\Angst vor Entgütigkeit                                   | 2  |
| Einstellung und Überzeugungen\Akzeptanz                                                      | 0  |
| Einstellung und Überzeugungen\Akzeptanz\Nicht-Akzeptieren der Erkrankung                     | 0  |
| Einstellung und Überzeugungen\Akzeptanz\Akzeptieren der Erkrankung                           | 3  |
| Einstellung und Überzeugungen\Akzeptanz\Nichtakzeptieren der medikamentösen Therapie         | 5  |
| Einstellung und Überzeugungen\Akzeptanz\Akzeptieren der medikamentösen Therapie              | 24 |
| Einstellung und Überzeugungen\Motivation                                                     | 0  |
| Einstellung und Überzeugungen\Motivation\Reduktion der Medikation                            | 1  |
| Einstellung und Überzeugungen\Motivation\Palliatives Setting                                 | 5  |
| Einstellung und Überzeugungen\Motivation\Kosteneffizienz                                     | 2  |
| Einstellung und Überzeugungen\Motivation\Hoffnung auf Schmerzlinderung                       | 9  |
| Einstellung und Überzeugungen\Motivation\Hoffnung auf Schmerzlinderung\Alltag bewältigen     | 9  |
| Einstellung und Überzeugungen\Verständnis                                                    | 10 |

|                                                                                                                             |    |
|-----------------------------------------------------------------------------------------------------------------------------|----|
| Einstellung und Überzeugungen\Verständnis\eigenes Erfahrungswissen                                                          | 7  |
| Einstellung und Überzeugungen\Verständnis\eigenes Erfahrungswissen\Erfahrung von Peers                                      | 1  |
| Einstellung und Überzeugungen\Verständnis\Aufklärung durch Shareholder Gesundheit                                           | 11 |
| Einstellung und Überzeugungen\Verständnis\Aufklärung durch Shareholder Gesundheit\Kenntnis des Medikationsplans             | 2  |
| Einstellung und Überzeugungen\Verständnis\Aufklärung durch Shareholder Gesundheit\Kenntnis des Medikationsplans\Dosisangabe | 10 |
| Einstellung und Überzeugungen\Verständnis\eigeninitiierte Verständnis                                                       | 5  |
| Einstellung und Überzeugungen\Verständnis\Annahmen und Vermutungen                                                          | 10 |
| Einstellung und Überzeugungen\Verständnis\Annahmen und Vermutungen\Kausalitäten                                             | 1  |
| Einstellung und Überzeugungen\Verständnis\Annahmen und Vermutungen\Korrektes medizinisches Wissen                           | 5  |
| Medikamentöse Therapie                                                                                                      | 15 |
| Medikamentöse Therapie\Kontrollemechanismen                                                                                 | 0  |
| Medikamentöse Therapie\Kontrollemechanismen\Hilfe durch Bezugsperson                                                        | 10 |
| Medikamentöse Therapie\Kontrollemechanismen\Einnahmerituale                                                                 | 10 |
| Medikamentöse Therapie\Kontrollemechanismen\Ein zentraler Ansprechpartner                                                   | 5  |
| Medikamentöse Therapie\Kontrollemechanismen\Einheitlicher Medikamentenplan                                                  | 2  |
| Medikamentöse Therapie\Kontrollemechanismen\Tabletten vorrichten                                                            | 6  |
| Medikamentöse Therapie\Kontrollemechanismen\Applikationstechnik umsetzbar?                                                  | 5  |
| Medikamentöse Therapie\Multimodale Therapie                                                                                 | 8  |
| Medikamentöse Therapie\Sucht oder Kontrollverlust                                                                           | 6  |
| Medikamentöse Therapie\Vergleich von Medikamentengruppen                                                                    | 22 |
| Medikamentöse Therapie\Tablettenanzahl                                                                                      | 9  |
| Medikamentöse Therapie\Wirkung der Medikamente                                                                              | 1  |

|                                                                                               |    |
|-----------------------------------------------------------------------------------------------|----|
| Medikamentöse Therapie\Wirkung der Medikamente\suffizient                                     | 26 |
| Medikamentöse Therapie\Wirkung der Medikamente\insuffizient                                   | 11 |
| Medikamentöse Therapie\Wirkung der Medikamente\Nebenwirkungen                                 | 3  |
| Medikamentöse Therapie\Wirkung der Medikamente\Nebenwirkungen\unerwünschte Nebenwirkungen     | 38 |
| Medikamentöse Therapie\Wirkung der Medikamente\Nebenwirkungen\gewünschte Nebenwirkungen       | 2  |
| Medikamentöse Therapie\Wirkung der Medikamente\Auslassen von Medikamenten                     | 6  |
| Medikamentöse Therapie\Wirkung der Medikamente\Auslassen von Medikamenten\End of dose failure | 3  |
| Krankengeschichte                                                                             | 0  |
| Krankengeschichte\Medikamentenanamnese                                                        | 12 |
| Krankengeschichte\Demographische Daten                                                        | 10 |
| Krankengeschichte\Behandlungsverlauf                                                          | 48 |
| Krankengeschichte\Krankheitsverlauf                                                           | 34 |
| Krankengeschichte\Schmerzverlauf                                                              | 49 |
| Zitierfähige Stellen                                                                          | 23 |
| Blumen am Wegesrand                                                                           | 7  |
| Wünsche für die Zukunft                                                                       | 7  |
| Sonstiges                                                                                     | 14 |
| GELB                                                                                          | 3  |
| ROT                                                                                           | 69 |
| BLAU                                                                                          | 63 |
| VIOLETT                                                                                       | 24 |
